# Supplementary material for: Three Novel Patient-Reported Outcome Measures to Assess the Patient Experience With Daily and Weekly HIV Oral Antiretroviral Therapy
Source: PubMed Central journal article supplement — J Acquir Immune Defic Syndr. 2024 Oct 7;97(3):286–95. doi: 10.1097/QAI.0000000000003482 (PMC11458103; doi:10.1097/qai.0000000000003482), 2024-10-07
Supplement: qai-97-286-s001.pdf [file qai-97-286-s001.pdf]

## Concept identification

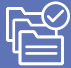

**1211 titles retrieved**

**997**  
eliminated by  
title review

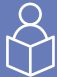

**214 abstracts read**

**177**  
eliminated by  
abstract review

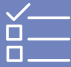

**37 full texts scored**

**19**  
eliminated  
after scoring

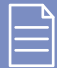

**18 publications selected for  
data abstraction**

## Instrument identification

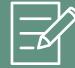

**140 instruments  
identified**

**84** eliminated  
by concept/  
subscale review

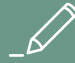

**56 instruments  
mapped**

**35**  
eliminated  
after mapping

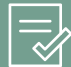

**21 instruments  
assessed**

**6** eliminated  
after design  
assessment

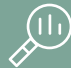

**15 instruments assessed for  
content validity and psychometrics**
